# Supplementary material for: Systematic metabolic engineering ofKlebsiella oxytocafor production of 1,3-propanediol from glucose
Source: Royal Society of Chemistry journal article supplement (doi:10.1039/d3re00501a), 2023-10-27
Supplement: d3re00501a1.pdf [file d3re00501a1.pdf]

## Supporting Information

### **Systematic metabolic engineering of *Klebsiella oxytoca* for production of 1,3-propanediol from glucose**

Zhifei Chen, Hongyu Liu, Xiao Han, Ping Xu\*, and Fei Tao\*

State Key Laboratory of Microbial Metabolism, Joint International Research Laboratory of Metabolic and Developmental Sciences, and School of Life Sciences and Biotechnology, Shanghai Jiao Tong University, Shanghai, People's Republic of China

\*Correspondence: Profs Drs Fei Tao and Ping Xu, School of Life Sciences & Biotechnology, Shanghai Jiao Tong University, Shanghai 200240, People's Republic of China, E-mail: taofei@sjtu.edu.cn (Fei Tao) or pingxu@sjtu.edu.cn (Ping Xu),  
Tel/Fax: +86-21-34206647

**Table S1. Bacterial strains and plasmids used in this study.**

| Strain or plasmid                         | Description                                                                                                                                                                                                                                                   | Source     |
|-------------------------------------------|---------------------------------------------------------------------------------------------------------------------------------------------------------------------------------------------------------------------------------------------------------------|------------|
| <b>Strain</b>                             |                                                                                                                                                                                                                                                               |            |
| <i>Escherichia coli</i> DH5 $\alpha$      | $F^-$ , $\phi 80d$ <i>lacZ</i> $\Delta$ M15, $\Delta$ ( <i>lacZYA-argF</i> )U169, <i>recA1</i> , <i>endA1</i> ,<br><i>hsdR17</i> ( <i>rk</i> , <i>mk</i> ), <i>phoA</i> , <i>supE44</i> $\lambda^-$ , <i>thi</i> <sup>-1</sup> , <i>gyrA96</i> , <i>relA1</i> | Invitroge  |
| <i>E. coli</i> S17-1 $\lambda$ <i>pir</i> | <i>TpR SmR recA</i> , <i>thi</i> , <i>pro</i> , <i>hsdR-M</i> + <i>RP4: 2-Tc:Mu: Km Tn7</i><br><i>lambda pir</i> .                                                                                                                                            | 1          |
| PDL-0                                     | <i>Klebsiella oxytoca</i> , wide type                                                                                                                                                                                                                         | 2          |
| PDL- <i>gpd</i>                           | PDL-0, harboring pBAD322cT-P <sub>tac</sub> - <i>gpd</i> -P <sub>tac</sub> - <i>gpp2</i>                                                                                                                                                                      | This study |
| PDL- <i>gpsA</i>                          | PDL-0, harboring pBAD322cT-P <sub>tac</sub> - <i>gpsA</i> -P <sub>tac</sub> - <i>gpp2</i>                                                                                                                                                                     | This study |
| PDL-01                                    | PDL-0, harboring pBAD322cT-P <sub>tac</sub> - <i>gpd1</i> -P <sub>tac</sub> - <i>gpp2</i>                                                                                                                                                                     | This study |
| PDL-02                                    | PDL-01 $\Delta$ <i>ldhA</i> , harboring pBAD322cT-P <sub>tac</sub> - <i>gpd1</i> -P <sub>tac</sub> -<br><i>gpp2</i>                                                                                                                                           | This study |
| PDL-03                                    | PDL-02 $\Delta$ <i>adhE</i> , harboring pBAD322cT-P <sub>tac</sub> - <i>gpd1</i> -P <sub>tac</sub> -<br><i>gpp2</i>                                                                                                                                           | This study |
| PDL-04                                    | PDL-03 $\Delta$ <i>pta</i> , harboring pBAD322cT-P <sub>tac</sub> - <i>gpd1</i> -P <sub>tac</sub> -<br><i>gpp2</i>                                                                                                                                            | This study |
| PDL-05                                    | PDL-04 $\Delta$ <i>poxB</i> , harboring pBAD322cT-P <sub>tac</sub> - <i>gpd1</i> -P <sub>tac</sub> -<br><i>gpp2</i>                                                                                                                                           | This study |
| PDL-06                                    | PDL-05 $\Delta$ <i>budA</i> , harboring pBAD322cT-P <sub>tac</sub> - <i>gpd1</i> -P <sub>tac</sub> -<br><i>gpp2</i>                                                                                                                                           | This study |
| PDL-07                                    | PDL-06 $\Delta$ <i>frdA</i> , harboring pBAD322cT-P <sub>tac</sub> - <i>gpd1</i> -P <sub>tac</sub> -<br><i>gpp2</i>                                                                                                                                           | This study |
| PDL1-1                                    | PDL-07 $\Delta$ <i>dhaD1</i> , harboring pBAD322cT-P <sub>tac</sub> - <i>gpd1</i> -P <sub>tac</sub> -<br><i>gpp2</i>                                                                                                                                          | This study |
| PDL1-2                                    | PDL1-1 $\Delta$ <i>glpK</i> , harboring pBAD322cT-P <sub>tac</sub> - <i>gpd1</i> -P <sub>tac</sub> -<br><i>gpp2</i>                                                                                                                                           | This study |
| PDL1-3                                    | PDL1-2 $\Delta$ <i>dhaD2</i> , harboring pBAD322cT-P <sub>tac</sub> - <i>gpd1</i> -P <sub>tac</sub> -<br><i>gpp2</i>                                                                                                                                          | This study |

|        |                                                                                                                           |            |
|--------|---------------------------------------------------------------------------------------------------------------------------|------------|
| PDL1-4 | PDL1-3 $\Delta$ <i>gldA</i> , harboring pBAD322cT-P <sub>tac</sub> - <i>gpd1</i> -P <sub>tac</sub> - <i>gpp2</i>          | This study |
| PDL1-5 | PDL1-4 $\Delta$ <i>dhaD3</i> , harboring pBAD322cT-P <sub>tac</sub> - <i>gpd1</i> -P <sub>tac</sub> - <i>gpp2</i>         | This study |
| PDL1-6 | PDL1-4 $\Delta$ <i>glpF</i> , harboring pBAD322cT-P <sub>tac</sub> - <i>gpd1</i> -P <sub>tac</sub> - <i>gpp2</i>          | This study |
| PDL2-1 | PDL1-5 $\Delta$ <i>ptsG</i> , harboring pBAD322cT-P <sub>tac</sub> - <i>gpd1</i> -P <sub>tac</sub> - <i>gpp2</i>          | This study |
| PDL2-2 | PDL1-6 $\Delta$ <i>ptsG</i> , harboring pBAD322cT-P <sub>tac</sub> - <i>gpd1</i> -P <sub>tac</sub> - <i>gpp2</i>          | This study |
| PDL2-3 | PDL2-2, harboring pBAD322cT-P <sub>tac</sub> - <i>gpd1</i> -P <sub>tac</sub> - <i>gpp2</i> -P <sub>tac</sub> - <i>glF</i> | This study |

---

#### Plasmid

|                                          |                                                                                                                                                    |            |
|------------------------------------------|----------------------------------------------------------------------------------------------------------------------------------------------------|------------|
| pKR6K <sub>Cm</sub>                      | Cm <sup>r</sup> , gene replacement vector derived from plasmid pK18 <i>mobsacB</i> , R6K origin, Mob <sup>+</sup> <i>sacB</i> , derived from PKR6K | 2          |
| pBAD322c                                 | Cm <sup>r</sup> , expressing vector, araBAD                                                                                                        | 3          |
| pBAD322cT                                | Cm <sup>r</sup> , promoter replacement vector derived from plasmid pBAD322c, P <sub>tac</sub>                                                      | This study |
| pBAD322cT-P <sub>tac</sub> - <i>gpd1</i> | pBAD322cT containing <i>gpd1</i> gene from <i>Saccharomyces cerevisiae</i> under the control of P <sub>tac</sub> promoter                          | This study |
| pBAD322cT-P <sub>tac</sub> - <i>gpd</i>  | pBAD322cT containing <i>gpd</i> gene from <i>Pichia kudriavzevii</i> under the control of P <sub>tac</sub> promoter                                | This study |
| pBAD322cT-P <sub>tac</sub> - <i>gpsA</i> | pBAD322cT containing <i>gpd</i> gene from <i>Archaeoglobus fulgidus</i> under the control of P <sub>tac</sub> promoter                             | This study |
| pBAD322cT-P <sub>tac</sub> - <i>gpp2</i> | pBAD322cT containing <i>gpp2</i> gene from <i>Sugiyamaella lignohabitans</i> under the control of P <sub>tac</sub> promoter                        | This study |
| pBAD322cT-P <sub>tac</sub> - <i>gpp2</i> | pBAD322cT-P <sub>tac</sub> - <i>gpsA</i> with the insertion of <i>gpp2</i> gene                                                                    | This study |

|                                                                                                         |                                                                                                                                                                                             |            |
|---------------------------------------------------------------------------------------------------------|---------------------------------------------------------------------------------------------------------------------------------------------------------------------------------------------|------------|
| <i>gpsA</i> -P <sub>tac</sub> - <i>gpp2</i>                                                             | under the control of P <sub>tac</sub> promoter                                                                                                                                              |            |
| pBAD322cT-P <sub>tac</sub> - <i>gpd1</i> -P <sub>tac</sub> - <i>gpp2</i>                                | pBAD322cT-P <sub>tac</sub> - <i>gpd1</i> with the insertion of <i>gpp2</i> gene                                                                                                             | This study |
| <i>gpd1</i> -P <sub>tac</sub> - <i>gpp2</i>                                                             | under the control of P <sub>tac</sub> promoter                                                                                                                                              |            |
| pBAD322cT-P <sub>tac</sub> - <i>gpd</i> -P <sub>tac</sub> - <i>gpp2</i>                                 | pBAD322cT-P <sub>tac</sub> - <i>gpd</i> with the insertion of <i>gpp2</i> gene                                                                                                              | This study |
| <i>gpd</i> -P <sub>tac</sub> - <i>gpp2</i>                                                              | under the control of P <sub>tac</sub> promoter                                                                                                                                              |            |
| pBAD322cT-P <sub>tac</sub> - <i>gpd1</i> -P <sub>tac</sub> - <i>gpp2</i> -P <sub>tac</sub> - <i>glf</i> | pBAD322cT-P <sub>tac</sub> - <i>gpd1</i> -P <sub>tac</sub> - <i>gpp2</i> with the insertion of <i>glf</i> gene from <i>Zymomonas mobilis</i> under the control of P <sub>tac</sub> promoter | This study |

---

Cm<sup>r</sup>: resistance to chloramphenicol

**Table S2 Sequences of primers used in this study.**

| Primer <sup>a</sup>                       | Sequence (5'-3') <sup>b</sup>           |
|-------------------------------------------|-----------------------------------------|
| <i>gpsA</i> -F( <i>Eco</i> RI)            | AATTGAATTCATGAACGCGCTTAACGCTG           |
| <i>gpsA</i> -R( <i>Pst</i> I)             | TTAACTGCAGTTAGTTGCTACGCTCGTCCTTG        |
| <i>gpd1</i> -F( <i>Eco</i> RI)            | AATTGAATTCATGAGTGCCGCCGCCGATCG          |
| <i>gpd1</i> -R( <i>Pst</i> I)             | TTAACTGCAGTCAATCTTCATGCAGATCCAGTTC      |
| <i>gpd</i> -F( <i>Eco</i> RI)             | AATTGAATTCATGGTTAGCCCGGCCGAA            |
| <i>gpd</i> -R( <i>Pst</i> I)              | TTAACTGCAGTTAATCTTCCACCGGTTCCAGGCA      |
| <i>gpp2</i> -F( <i>Eco</i> RI)            | AATTGAATTCATGAGCTCTGCCAGTACTCCG         |
| <i>gpp2</i> -R( <i>Pst</i> I)             | TTAACTGCAGTTAGGCCACGATGTTGCTAAAGGT      |
| $\Delta$ <i>frdA</i> -FU( <i>Eco</i> RI)  | AATTGAATTCAGTCCCTGAGAATGACCAG           |
| $\Delta$ <i>frdA</i> -RU                  | TCTTGTTGACCAGAACGACATTCCTCCAGTTTTTGTTTA |
| $\Delta$ <i>frdA</i> -FD                  | ACTGGAGGAATGTCGTTCTGGTCAACAAGAACGGCTAC  |
| $\Delta$ <i>frdA</i> -RD( <i>Bam</i> HI)  | ATGCGGATCCGCCCGCTTCGGTTGCGC             |
| $\Delta$ <i>glpK</i> -FU( <i>Eco</i> RI)  | AATTGAATTCGATGATGAAGATCCTGTGATCG        |
| $\Delta$ <i>glpK</i> -RU                  | ATCCCTGGTGGGCGTAGGTAGTCTCCTGAGTCACAC    |
| $\Delta$ <i>glpK</i> -FD                  | TCAGGAGACTACCTACGCCACCAGGGAATCGAACGC    |
| $\Delta$ <i>glpK</i> -RD( <i>Bam</i> HI)  | ATGCGGATCCCGCGGTTAATTAACCACCGGAA        |
| $\Delta$ <i>dhaD1</i> -FU( <i>Eco</i> RI) | AATTGAATTCACCGCCTGACGATATGCGAT          |
| $\Delta$ <i>dhaD1</i> -RU                 | CACCAAAGGAAAGCTATGATGAGCCCCGGTGTTC      |
| $\Delta$ <i>dhaD1</i> -FD                 | GTGAGGGTGTAGAGAAGCTTTCCTTTGGTGATAACCC   |
| $\Delta$ <i>dhaD1</i> -RD( <i>Bam</i> HI) | ATGCGGATCCGGAAATGGAACCGAACAGACGCC       |
| $\Delta$ <i>dhaD2</i> -FU( <i>Eco</i> RI) | AATTGAATTCACCTGGTCAGTGAGCCCCG           |
| $\Delta$ <i>dhaD2</i> -RU                 | GCACCGGTAACGGCAATCTCTACACCCTCACATTGAA   |
| $\Delta$ <i>dhaD2</i> -FD                 | GTGAGGGTGTAGAGATTGCCGTTACCGGTGCCGG      |
| $\Delta$ <i>dhaD2</i> -RD( <i>Bam</i> HI) | ATGCGGATCCGAGCCAAATAAACGCCCA            |
| $\Delta$ <i>dhaD3</i> -FU( <i>Eco</i> RI) | AATTGAATTCATCCCCAGCTGTTTGGCAT           |
| $\Delta$ <i>dhaD3</i> -RU                 | GAATAAACGGGGACAATGCTGTCCTTGTGCTGTTTC    |
| $\Delta$ <i>dhaD3</i> -FD                 | ACAAGGACAGCATTGTCCCCGTTTTATTGCGCTC      |

|                                    |                                                      |
|------------------------------------|------------------------------------------------------|
| $\Delta dhaD3$ -RD( <i>Bam</i> HI) | ATGCGGATCCGACACGATAAACAGGTCGCTCAG                    |
| $\Delta glpF$ -FU( <i>Eco</i> RI)  | AATTGAATTCGCGCGCTCTGTACTTCCTG                        |
| $\Delta glpF$ -RU                  | ACCGGATGATGGGAAAATCGAATCCTGAAGCGTAGTG                |
| $\Delta glpF$ -FD                  | CTTCAGGATTCGATTTTCCCATCATCCGGTAGGTC                  |
| $\Delta glpF$ -RD( <i>Bam</i> HI)  | ATGCGGATCCGACGTTCTGATTGTGGTGGT                       |
| $\Delta ptsG$ -FU( <i>Eco</i> RI)  | AATTGAATTCGCACAACAGACGACTGAAAATTT                    |
| $\Delta ptsG$ -RU                  | TGGCGTCTTCACGACTTCACCATGATGCCGTAAGC                  |
| $\Delta ptsG$ -FD                  | CGGCATCATGGTGAAGTCGTGAAGACGCCACCG                    |
| $\Delta ptsG$ -RD( <i>Bam</i> HI)  | ATGCGGATCCCGGTGGCGTCTTCACGAC                         |
| <i>glF</i> -F( $P_{tac}$ )         | CCAAGAGATATACAT ATGAGCAGCGAAAGCAGCCA                 |
| <i>glF</i> -R( <i>Hind</i> III)    | TTTCGCCAAACAGCC <u>AAGCTT</u> TTTATTTCTGCGAGCGCCACAT |
| $P_{tac}$ -F( <i>Hind</i> III)     | AACATCGTGGCCTAAAAGCTTCTGTGGTATGGCTGTGCAGGT           |
|                                    | C                                                    |
| $P_{tac}$ -R( <i>glF</i> )         | GCTTTCGCTGCTCATATGTATATCTCTTGGTGAAATTGTT             |

---

<sup>a</sup>-F indicates that this is a sense primer; -R indicates that this is an antisense primer.

<sup>b</sup>Restriction sites are underlined.

## References

1. Y. Wang, F. Tao and P. Xu, *J. Biol. Chem.*, 2014, **289**, 6080–6090.
2. B. Xin, F. Tao, Y. Wang, H. Liu, C. Ma and P. Xu, *Metab. Eng.*, 2017, **41**, 102–114.
3. J. E. Cronan, *Plasmid*, 2006, **55**, 152–157.
